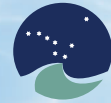

## Erratum

### Incorporating natural variability in biological reference points and population dynamics into management of Atlantic salmon (*Salmo salar* L.) stocks returning to home waters

Jonathan White, Niall O' Maoiléidigh, Paddy Gargan, Elvira de Eyto, Gerald Chaput, Willie Roche, Phil McGinnity, Walter W. Crozier, Paddy Boylan, Dennis Doherty, Kealan O'Higgins, Brian Kennedy, Ian Lawler, David Lyons, and Ferdia Marnell

White, J., O' Maoiléidigh, N., Gargan, P., de Eyto, E., Chaput, G., Roche, W., McGinnity, P., Crozier, W. W., Boylan, P., Doherty, D., O'Higgins, K., Kennedy, B., Lawler, I., Lyons, D., and Marnell, F. Incorporating natural variability in biological reference points and population dynamics into management of Atlantic salmon (*Salmo salar* L.) stocks returning to home waters. – ICES Journal of Marine Science, 74: 888.

Advance access publication 27 January 2017.

ICES Journal of Marine Science (2016), 73(6), 1513–1524. doi:10.1093/icesjms/fsw015

An error has been corrected on page 10 (p. 1522), in the 3<sup>rd</sup> paragraph, 2<sup>nd</sup> sentence.

The sentence previously stated: “Where a stock is exceeding CL, no harvest fishery is allowed.”

This has been corrected to: “Where a stock is exceeding CL, a harvest fishery is allowed.”

The publisher apologizes for this error.
